# Supplementary material
Source: Springer Nature journal article supplement (https://www.springermedizin.de/resource/supplementary/12883_2012_590_MOESM3_ESM.pdf/9455772)

| Study              | Early Seizure Incidence |        | Odds Ratio (95 CI%)      |
|--------------------|-------------------------|--------|--------------------------|
|                    | PHY                     | LEV    |                          |
| Jones 2008         | 0/41                    | 1/32   | 0.253 (0.010 - 6.421)    |
| Milligan 2008      | 11/210                  | 2/105  | 2.847 (0.619 – 13.085)   |
| Szaflarski 2010    | 3/18                    | 5/34   | 1.160 (0.243 - 5.527)    |
| Taylor 2010        | 2/25                    | 0/60   | 12.872 (0.595 - 278.270) |
| Murphey–Human 2011 | 10/297                  | 12/145 | 0.386 (0.163 – 0.916)    |
| POOLED             | 26/591                  | 20/376 | 1.118 (0.343 – 3.636)    |

(I- squared = 56.6 % p = 0.056)

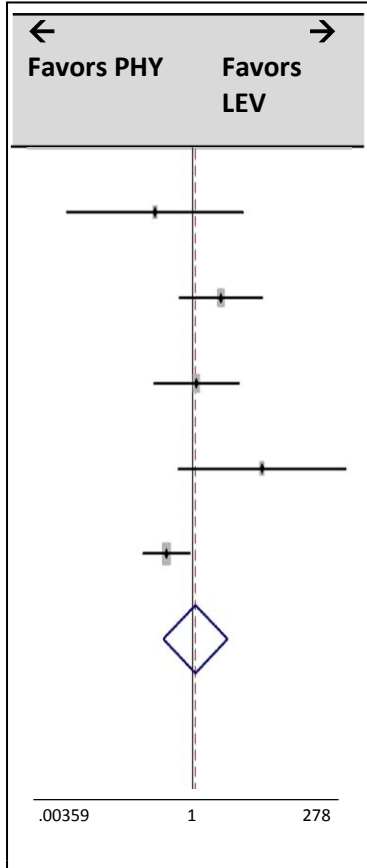

| Study              | Early Seizure Incidence |        | Odds Ratio (95 CI%)      |
|--------------------|-------------------------|--------|--------------------------|
|                    | PHY                     | LEV    |                          |
| Jones 2008         | 0/41                    | 1/32   | 0.253 (0.010 - 6.421)    |
| Milligan 2008      | 11/210                  | 2/105  | 2.847 (0.619 – 13.085)   |
| Szaflarski 2010    | 3/18                    | 5/34   | 1.160 (0.243 - 5.527)    |
| Taylor 2010        | 2/25                    | 0/60   | 12.872 (0.595 - 278.270) |
| Murphey–Human 2011 | 10/297                  | 12/145 | 0.386 (0.163 – 0.916)    |
| POOLED             | 26/591                  | 20/376 | 1.118 (0.343 – 3.636)    |

(I- squared = 56.6 % p = 0.056)

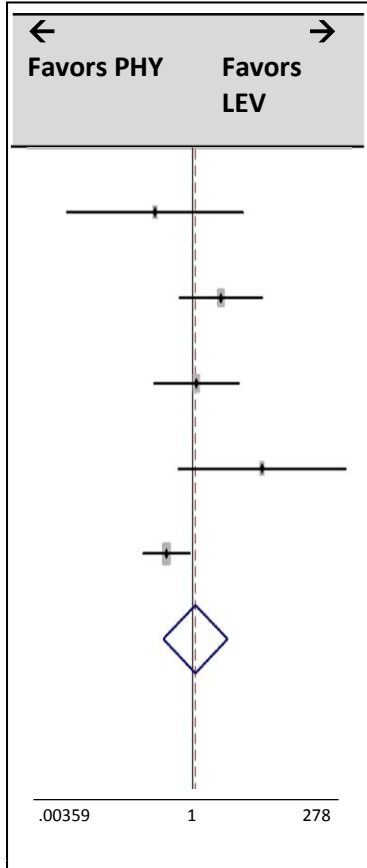

Supplement: MOESM3 [file 9455772]
